# Supplementary material for: A colorimetric sensor for Cu2+ in aqueous solution based on metal ion-induced deprotonation: deprotonation/protonation mediated by Cu2+-ligand interactions
Source: Royal Society of Chemistry journal article supplement (doi:10.1039/b816999c), 2009-01-01
Supplement: b816999c.pdf [file b816999c.pdf]

## **Supporting information**

### **A Colorimetric Sensor for Cu<sup>2+</sup> in Aqueous Solution Based on Metal Ion-induced Deprotonation: Deprotonation/protonation Mediated by Cu<sup>2+</sup>-ligand Interactions**

Junhai Huang, Yufang Xu, Xuhong Qian\*

Shanghai Key Laboratory of Chemical Biology, School of Pharmacy, East China University of Science and Technology Shanghai 200237, China.

Email Address: E-mail: [xhqian@ecust.edu.cn](mailto:xhqian@ecust.edu.cn)

## S1. Association Constants and Curve fitting

The following equation was used for the nonlinear least squares analysis to determine the  $K_a$ :

$$Y = Y_0 + \frac{Y_{\text{lim}} - Y_0}{2} \left\{ 1 + \frac{c_M}{c_L} + \frac{1}{K_s c_L} - \left[ \left( 1 + \frac{c_M}{c_L} + \frac{1}{K_s c_L} \right)^2 - 4 \frac{c_M}{c_L} \right]^{1/2} \right\}$$

$Y$  was the recorded absorbance intensity,  $Y_0$  was the start value without the addition of target molecule (metal ions, amino acids),  $Y_{\text{lim}}$  was the limiting value (left as a floating parameter),  $c_M$  was the target molecule concentration, and  $c_L$  was the sensor concentration.<sup>1</sup>

## S2 Partial spectra of NMR, HR-MS

<sup>13</sup>C 1D experiment

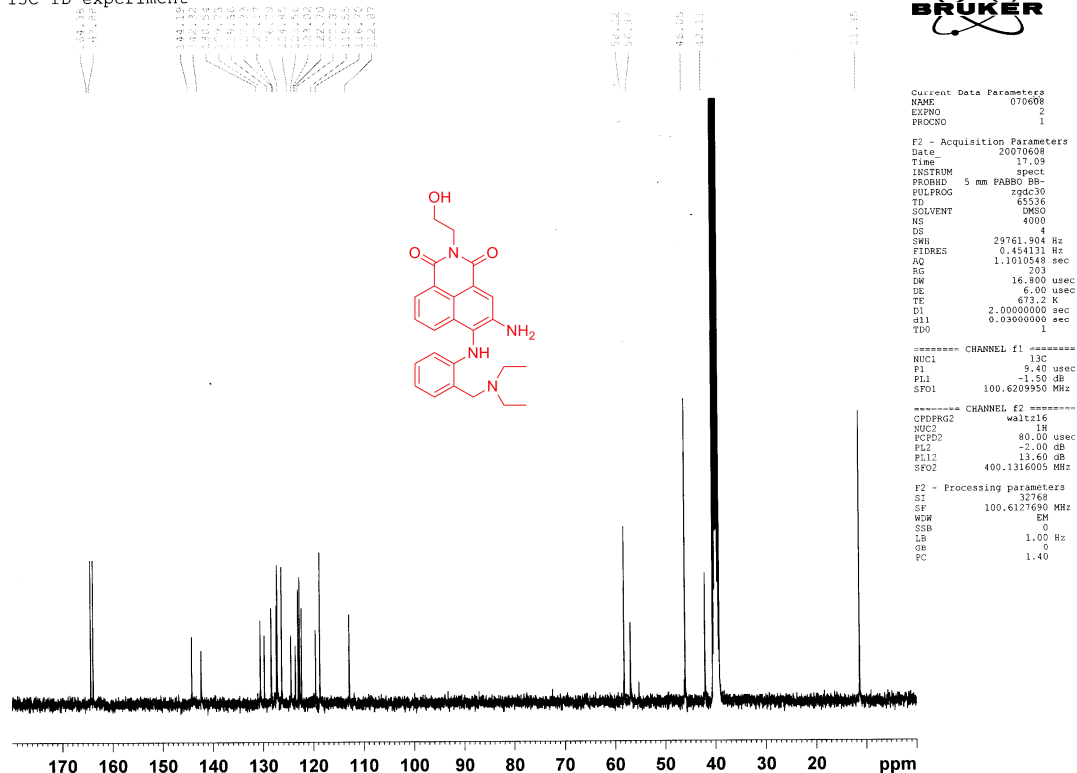

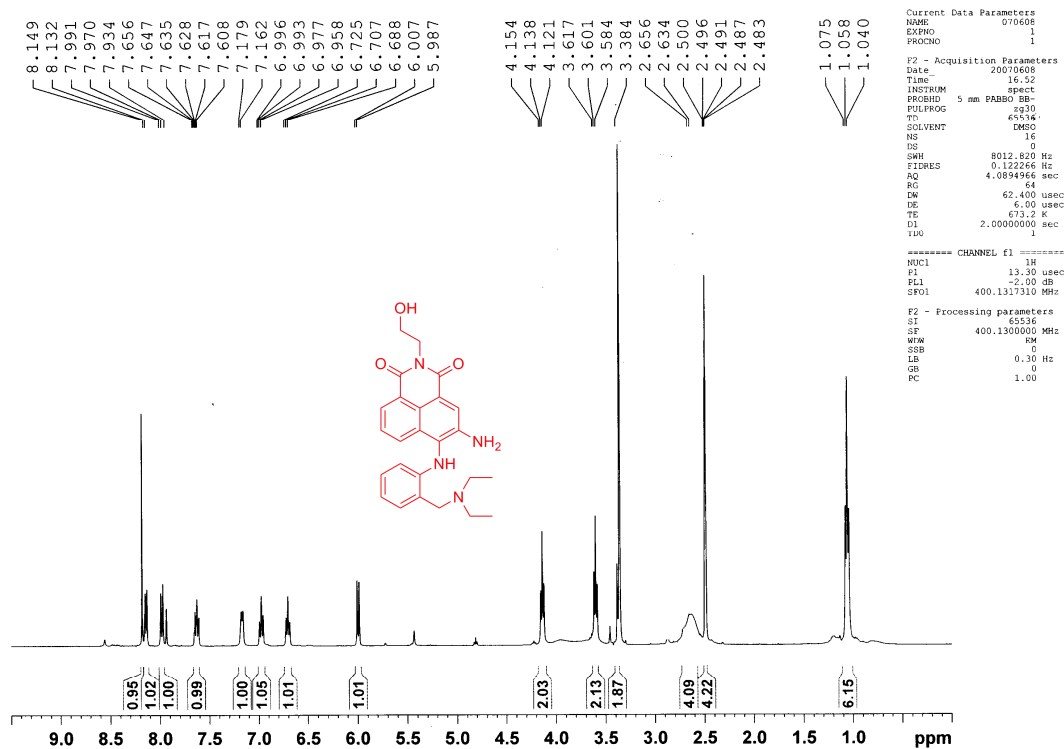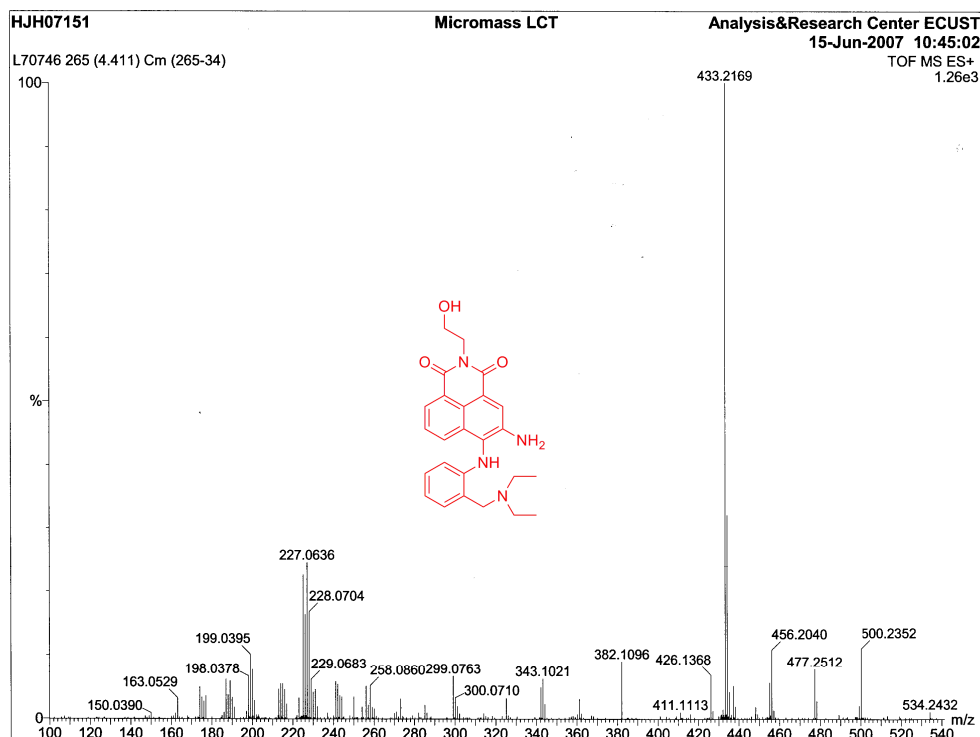

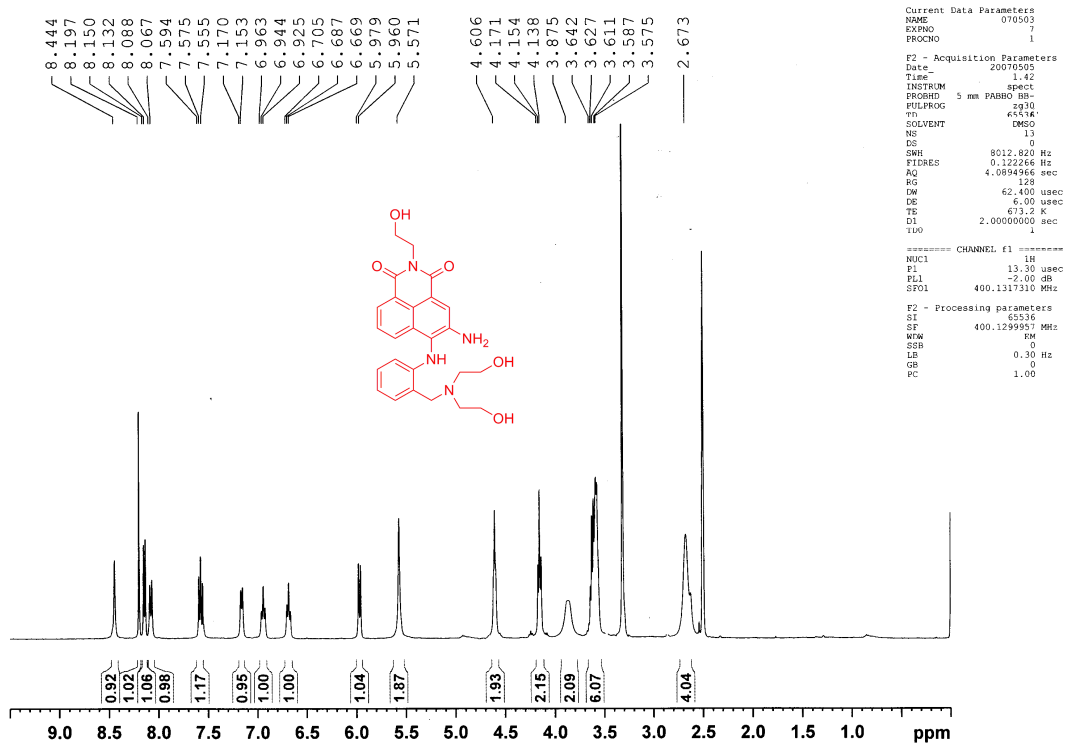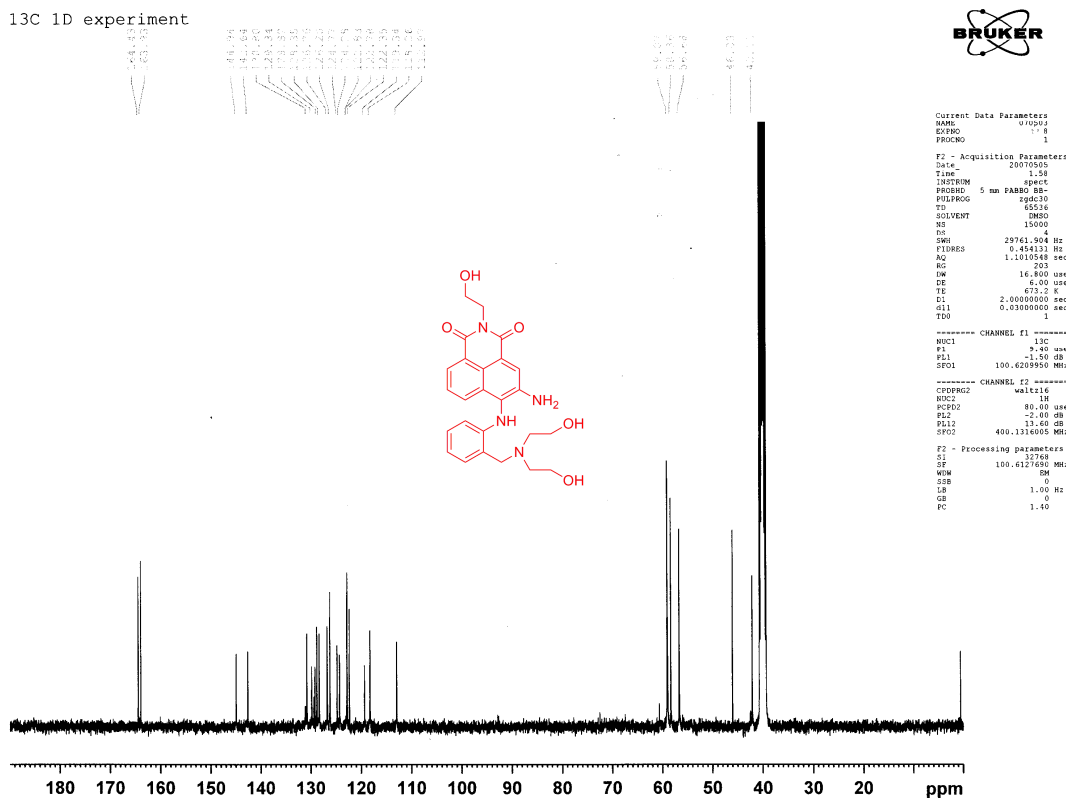

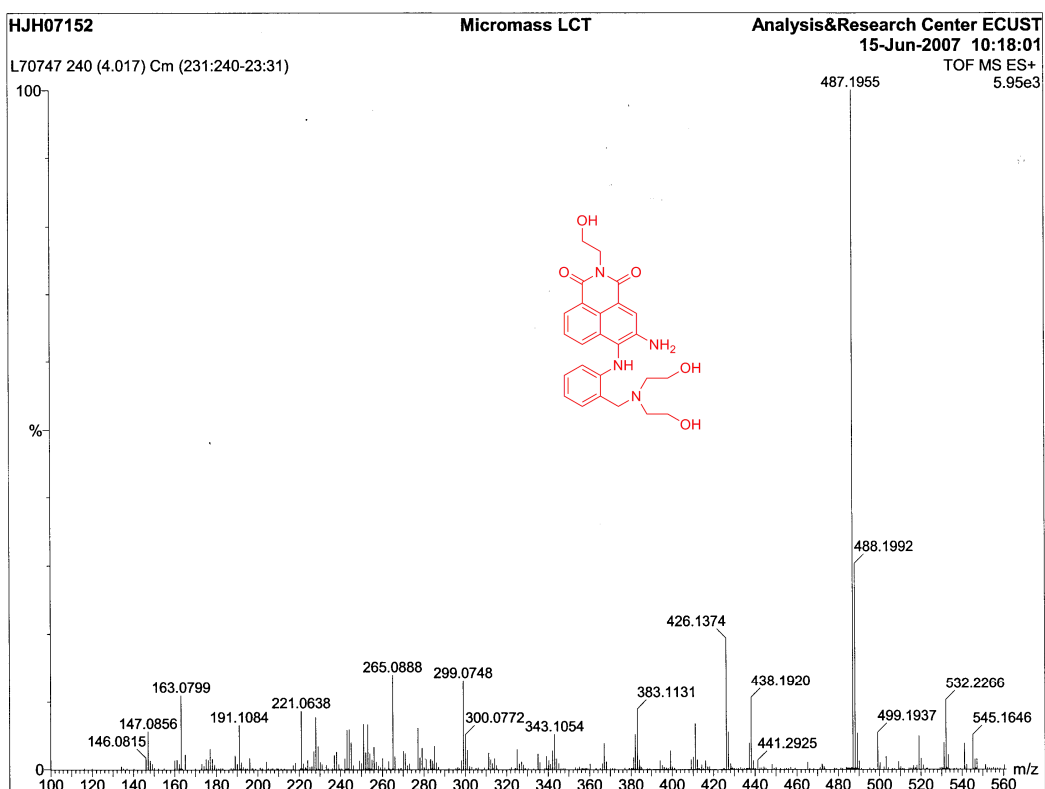

### S3. The Job's plot of 3 with $\text{Cu}^{2+}$ ion

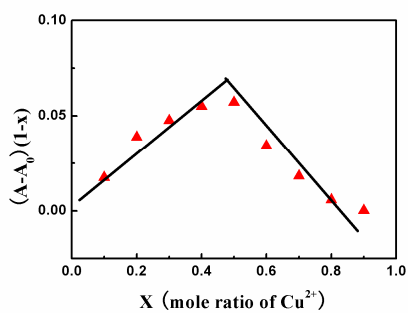

Figure S3. Job's plots of 3 in Tris buffer (pH6.98) solution, the total concentration of sensors and  $\text{Cu}^{2+}$  ion is  $2 \times 10^{-5}$  M.

#### S4. ESI-Mass spectra of 3/Cu<sup>2+</sup> complex

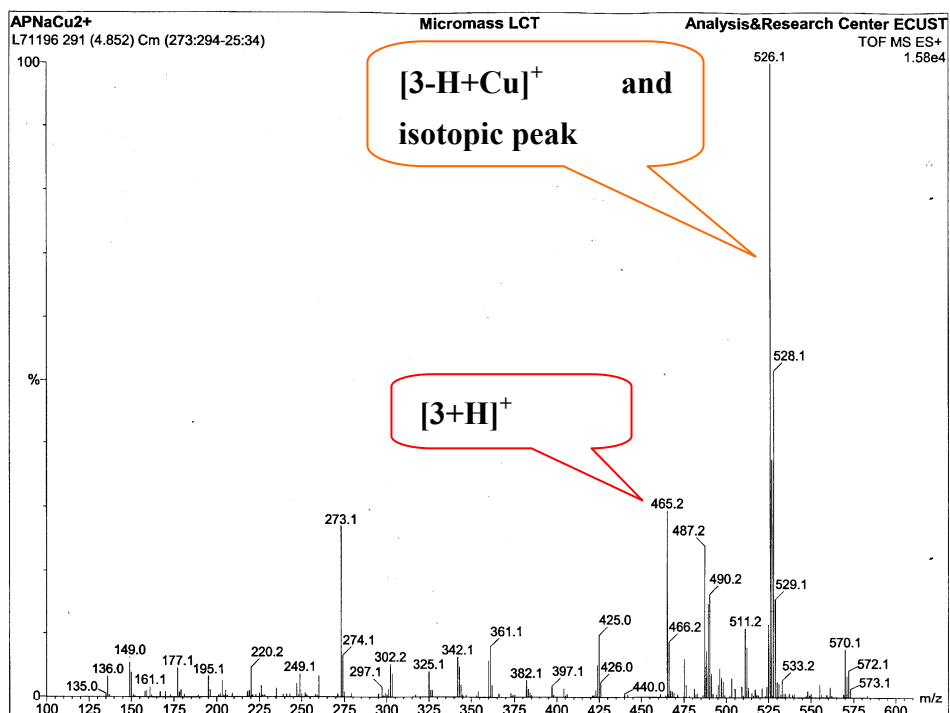

Fig. S4. ES+ mass spectra of **3** ( $1 \times 10^{-5}$  M) in the presence of Cu<sup>2+</sup> in ethanol/water (2/8) solution (cautions: buffer salts could not be used).

#### S5. The UV/vis responses of **3** in a diluted solution

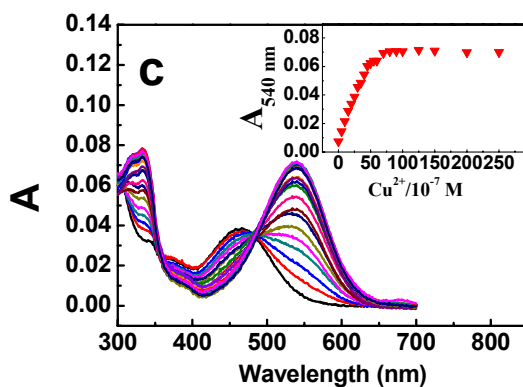

Fig. S5. Cu<sup>2+</sup>-titration induced the absorption changes of sensor **3** ( $5.0 \times 10^{-6}$  M) in 10 mM Tris buffer (pH 6.98) solution. Inset showed the changes at 540 nm as a function of Cu<sup>2+</sup> concentration at  $10^{-7}$  M

### S6. Curve fitting and Binding constant

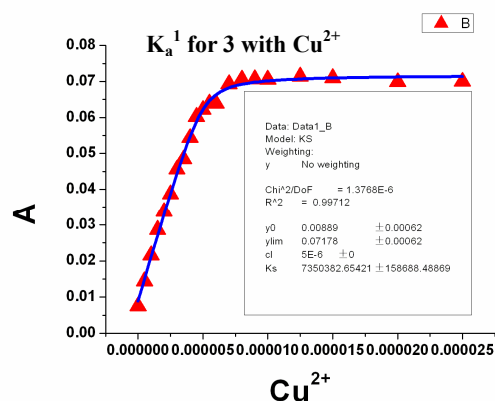

Curve fitting to determinate the association constant according the equation 1 in S1. In order to avoid the  $K_s C_L \gg 1$ , the dates acquired in diluted solution ( $5 \times 10^{-6}$  M).

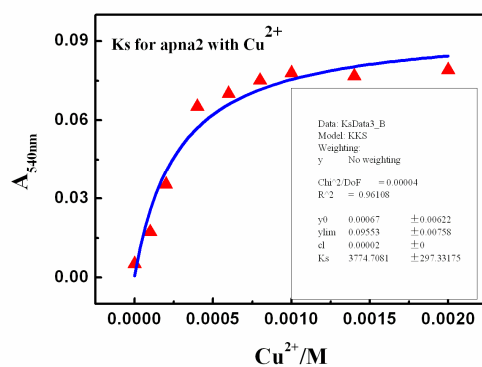

Curve fitting to determinate the association constant according the equation 1 in S1. A solution of **2** ( $2 \times 10^{-5}$  M) was used to determine the association constant ( $K_a$ )

### S7. The UV/vis responses of 3 to different cations

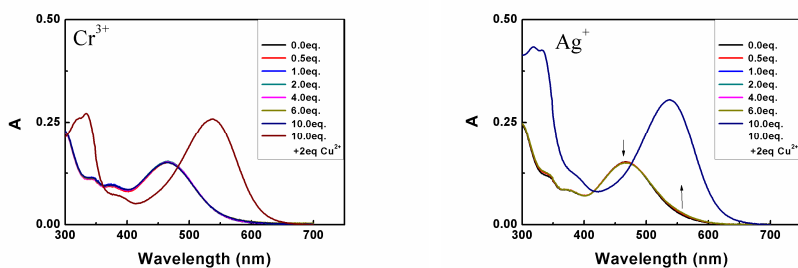

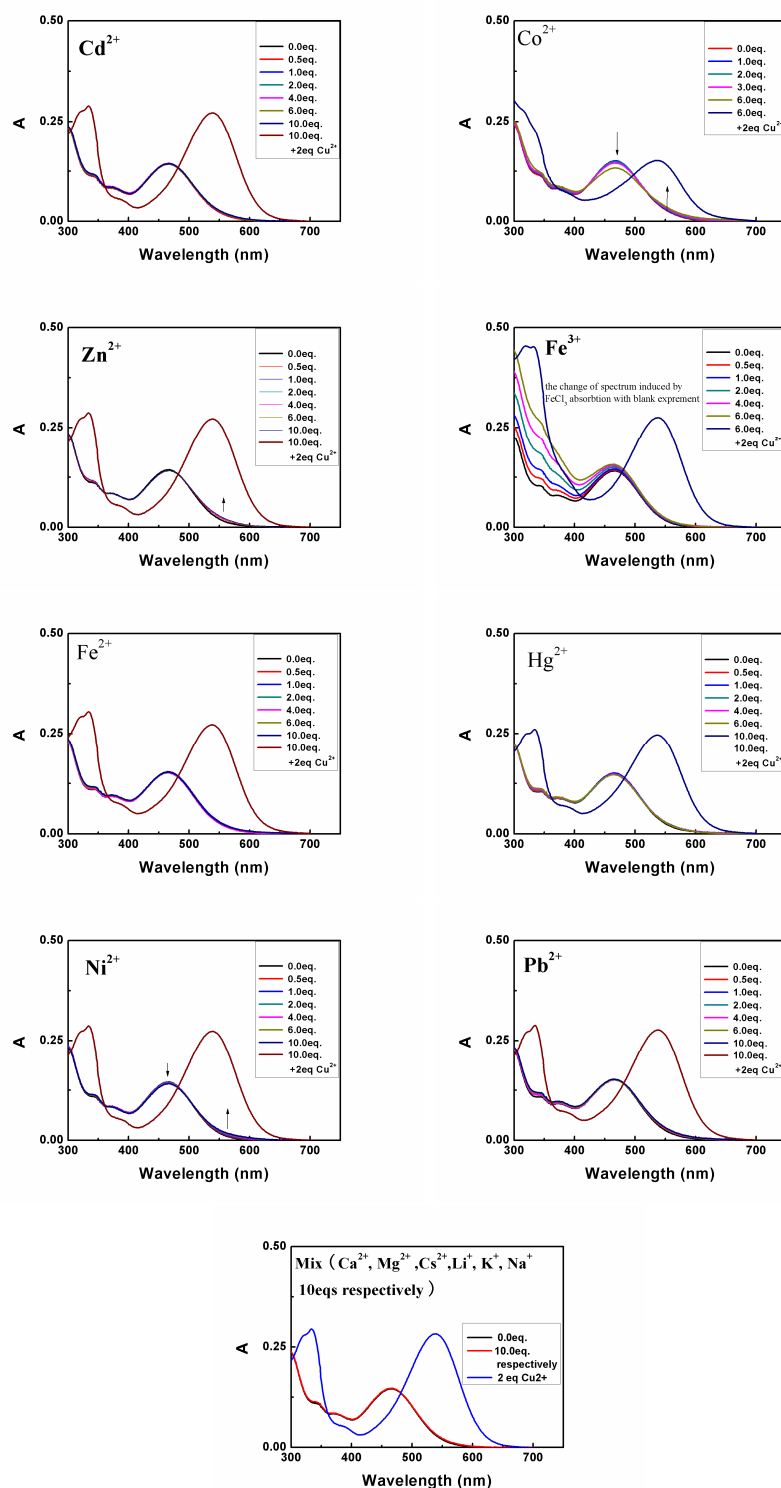

Fig.S7a. UV-Vis absorption spectra of **3** ( $2 \times 10^{-5}$  M) in buffer (10 mM Tris, pH6.98) solution upon addition of different concentrations of various metal ions. Note: the UV/vis (300 nm to 400 nm) changes-induced by FeCl<sub>3</sub> came from the absorption itself of FeCl<sub>3</sub>.



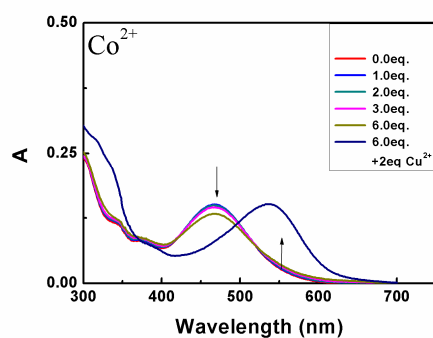

Figure S7b. The UV changes of **3** ( $2 \times 10^{-5}$  M) in the presence of  $\text{Co}^{2+}$  (0 to 10 equiv) in 10 mM Tris (pH6.98) buffer solution. The result indicated that  $\text{Cu}^{2+}$  could induce the absorption band red shift without interference from  $\text{Co}^{2+}$ , but the UV intensity at 540 nm decreased 40% compared to the intensity in the absence  $\text{Co}^{2+}$ .

### References and notes

1. B. Valeur, *Molecular Fluorescence. Principles and Applications*; Wiley-VCH: Weinheim, 2002
